# Supplementary material for: Genotypic and Phenotypic Applications for the Differentiation and Species-Level Identification of Achromobacter for Clinical Diagnoses
Source: PubMed Central journal article supplement (PMC4256396; doi:10.1371/journal.pone.0114356), 2014-12-04
Supplement: pone.0114356.s001.pdf [file pone.0114356.s001.pdf]

**Supplemental Table S1.** Strains of *Achromobacter* species and GenBank accession numbers for the sequences used in this study. Accession numbers indicated in bold are for sequences determined in this study.

| Strain                  | <i>recA</i> identification | Origin                                       | 16SrRNA         | <i>atpD</i>     | <i>gyrB</i>     | <i>recA</i>     | <i>rpoB</i>     |
|-------------------------|----------------------------|----------------------------------------------|-----------------|-----------------|-----------------|-----------------|-----------------|
| CCUG 407 <sup>T</sup>   | <i>A. denitrificans</i>    | Soil                                         | FM999734        | <b>HG454790</b> | <b>HG454848</b> | <b>HG454906</b> | <b>HG454964</b> |
| CCUG 724 <sup>T</sup>   | <i>A. piechaudii</i>       | Pharynx                                      | FM999731        | <b>HG454791</b> | <b>HG454849</b> | <b>HG454907</b> | <b>HG454965</b> |
| CCUG 47057 <sup>T</sup> | <i>A. insolitus</i>        | Leg wound                                    | FM999733        | <b>HG454792</b> | <b>HG454850</b> | <b>HG454908</b> | <b>HG454966</b> |
| CCUG 47062 <sup>T</sup> | <i>A. spanius</i>          | Blood                                        | FM999732        | <b>HG454793</b> | <b>HG454851</b> | <b>HG454909</b> | <b>HG454967</b> |
| CCUG 56371 <sup>T</sup> | <i>A. marplatensis</i>     | Soil                                         | EU150134        | <b>HG454794</b> | <b>HG454852</b> | <b>HG454910</b> | <b>HG454968</b> |
| CCUG 56438 <sup>T</sup> | <i>A. xylosoxidans</i>     | Ear discharge                                | FM999735        | <b>HG454795</b> | <b>HG454853</b> | <b>HG454911</b> | <b>HG454969</b> |
| CCUG 57103 <sup>T</sup> | <i>A. ruhlandii</i>        | Soil                                         | <b>HG423398</b> | <b>HG454796</b> | <b>HG454854</b> | <b>HG454912</b> | <b>HG454970</b> |
| CCUG 61961 <sup>T</sup> | <i>A. mucicolens</i>       | Human sputum, non-CF patient                 | HE613446        | <b>HG454797</b> | <b>HG454855</b> | <b>HG454913</b> | <b>HG454971</b> |
| CCUG 61966 <sup>T</sup> | <i>A. animicus</i>         | Human sputum, non-CF patient                 | HE613448        | <b>HG454798</b> | <b>HG454856</b> | <b>HG454914</b> | <b>HG454972</b> |
| CCUG 61968 <sup>T</sup> | <i>A. spiritinus</i>       | Human sputum, non-CF patient                 | HE613447        | <b>HG454799</b> | <b>HG454857</b> | <b>HG454915</b> | <b>HG454973</b> |
| CCUG 61972 <sup>T</sup> | <i>A. pulmonis</i>         | Human sputum, CF patient                     | HE798552        | <b>HG454800</b> | <b>HG454858</b> | <b>HG454916</b> | <b>HG454974</b> |
| CCUG 307*               | <i>A. denitrificans</i>    | Human wound, 18-yr-old man                   | <b>HG423399</b> | <b>HG454801</b> | <b>HG454859</b> | <b>HG454917</b> | <b>HG454975</b> |
| CCUG 366                | <i>A. insolitus</i>        | Human pleural fluid                          | <b>HG423400</b> | <b>HG454802</b> | <b>HG454860</b> | <b>HG454918</b> | <b>HG454976</b> |
| CCUG 2072*              | <i>A. denitrificans</i>    | Not known                                    | <b>HG423401</b> | <b>HG454803</b> | <b>HG454861</b> | <b>HG454919</b> | <b>HG454977</b> |
| CCUG 2349*              | <i>A. ruhlandii</i>        | Human blood                                  | <b>HG423402</b> | <b>HG454804</b> | <b>HG454862</b> | <b>HG454920</b> | <b>HG454978</b> |
| CCUG 31491              | <i>A. spanius</i>          | Not known                                    | <b>HG423403</b> | <b>HG454805</b> | <b>HG454863</b> | <b>HG454921</b> | <b>HG454979</b> |
| CCUG 39682              | <i>A. ruhlandii</i>        | Human, CF patient                            | <b>HG423404</b> | <b>HG454806</b> | <b>HG454864</b> | <b>HG454922</b> | <b>HG454980</b> |
| CCUG 41513              | <i>A. xylosoxidans</i>     | Human sputum, 26-yr-old patient, CF          | <b>HG423405</b> | <b>HG454807</b> | <b>HG454865</b> | <b>HG454923</b> | <b>HG454981</b> |
| CCUG 42363              | <i>A. xylosoxidans</i>     | Human sputum, 18-yr-old male, CF             | <b>HG423406</b> | <b>HG454808</b> | <b>HG454866</b> | <b>HG454924</b> | <b>HG454982</b> |
| CCUG 44449              | <i>A. spanius</i>          | Human choledochus secretion, 61-yr-old woman | <b>HG423407</b> | <b>HG454809</b> | <b>HG454867</b> | <b>HG454925</b> | <b>HG454983</b> |
| CCUG 45179              | <i>A. xylosoxidans</i>     | Human sputum, CF                             | <b>HG423408</b> | <b>HG454810</b> | <b>HG454868</b> | <b>HG454926</b> | <b>HG454984</b> |
| CCUG 47056              | <i>A. insolitus</i>        | Laboratory sink                              | <b>HG423409</b> | <b>HG454811</b> | <b>HG454869</b> | <b>HG454927</b> | <b>HG454985</b> |

|             |                                      |                                                  |          |          |          |          |          |
|-------------|--------------------------------------|--------------------------------------------------|----------|----------|----------|----------|----------|
| CCUG 47059  | <i>A. insolitus</i>                  | Human wound                                      | HG423410 | HG454812 | HG454870 | HG454928 | HG454986 |
| CCUG 47060  | <i>A. insolitus</i>                  | Not known                                        | HG423411 | HG454813 | HG454871 | HG454929 | HG454987 |
| CCUG 47061  | <i>A. insolitus</i>                  | Not known                                        | HG423412 | HG454814 | HG454872 | HG454930 | HG454988 |
| CCUG 47063  | <i>A. spanius</i>                    | Not known                                        | HG423413 | HG454815 | HG454873 | HG454931 | HG454989 |
| CCUG 47064  | <i>A. spanius</i>                    | Not known                                        | HG423414 | HG454816 | HG454874 | HG454932 | HG454990 |
| CCUG 47382  | <i>A. marplatensis/A. spiritinus</i> | Not known                                        | HG423415 | HG454817 | HG454875 | HG454933 | HG454991 |
| CCUG 47463  | <i>A. piechaudii</i>                 | Human bronchial alveolar lavage, 58-yr-old woman | HG423416 | HG454818 | HG454876 | HG454934 | HG454992 |
| CCUG 47596  | <i>A. xylosoxidans</i>               | Human CF, 21-yr-old female                       | HG423417 | HG454819 | HG454877 | HG454935 | HG454993 |
| CCUG 48135  | <i>A. ruhlandii</i>                  | Human sputum, CF patient                         | HG423418 | HG454820 | HG454878 | HG454936 | HG454994 |
| CCUG 48331  | <i>A. ruhlandii</i>                  | Human sputum, 29-year old woman, CF              | HG423419 | HG454821 | HG454879 | HG454937 | HG454995 |
| CCUG 48386  | <i>A. ruhlandii</i>                  | Human sputum, 30-yr-old woman, CF                | HG423420 | HG454822 | HG454880 | HG454938 | HG454996 |
| CCUG 48584  | <i>A. ruhlandii</i>                  | Human sputum, 29-yr-old woman, CF                | HG423421 | HG454823 | HG454881 | HG454939 | HG454997 |
| CCUG 48684  | <i>A. ruhlandii</i>                  | Human sputum,30-yr-old woman, CF                 | HG423422 | HG454824 | HG454882 | HG454940 | HG454998 |
| CCUG 52128  | <i>A. pulmonis</i>                   | Environmental control                            | HG423423 | HG454825 | HG454883 | HG454941 | HG454999 |
| CCUG 52730  | <i>A. ruhlandii</i>                  | Human sputum,50-yr-old woman                     | HG423424 | HG454826 | HG454884 | HG454942 | HG455000 |
| CCUG 53465  | <i>A. xylosoxidans</i>               | Human synovial fluid,81-yr-old man, prosthesis   | HG423425 | HG454827 | HG454885 | HG454943 | HG455001 |
| CCUG 53665  | <i>A. xylosoxidans</i>               | Human sputum,89-yr-old woman                     | HG423426 | HG454828 | HG454886 | HG454944 | HG455002 |
| CCUG 54268* | <i>A. denitrificans</i>              | Human trachea,39-yr-old man                      | HG423427 | HG454829 | HG454887 | HG454945 | HG455003 |
| CCUG 54301  | <i>A. mucicolens</i>                 | Human sputum,13-yr-old boy                       | HG423428 | HG454830 | HG454888 | HG454946 | HG455004 |
| CCUG 54610* | <i>A. pulmonis</i>                   | Human eye lens,16-yr-old boy                     | HG423429 | HG454831 | HG454889 | HG454947 | HG455005 |
| CCUG 55796  | <i>A. insolitus</i>                  | Human sputum,16-yr-old male, CF                  | HG423430 | HG454832 | HG454890 | HG454948 | HG455006 |
| CCUG 56040  | <i>A. insolitus</i>                  | Human sputum,16-yr-old male, CF                  | HG423431 | HG454833 | HG454891 | HG454949 | HG455007 |
| CCUG 56089* | <i>A. piechaudii</i>                 | Human mucosa,75-yr-old man, cheek                | HG423432 | HG454834 | HG454892 | HG454950 | HG455008 |
| CCUG 56202* | <i>A. denitrificans</i>              | Human sputum,65-yr-old woman, CF                 | HG423433 | HG454835 | HG454893 | HG454951 | HG455009 |
| CCUG 56295  | <i>A. xylosoxidans</i>               | Human sputum,27-yr-old man                       | HG423434 | HG454836 | HG454894 | HG454952 | HG455010 |
| CCUG 56600  | <i>A. ruhlandii</i>                  | Human sputum,34-yr-old woman, CF                 | HG423435 | HG454837 | HG454895 | HG454953 | HG455011 |
| CCUG 57172  | <i>A. xylosoxidans</i>               | Human bronchioalveolar lavage,50-yr-old man      | HG423436 | HG454838 | HG454896 | HG454954 | HG455012 |
| CCUG 61960  | <i>A. mucicolens</i>                 | Human epiglottis swab, non-CF patient            | HG423437 | HG454839 | HG454897 | HG454955 | HG455013 |

|                         |                                      |                              |                 |                 |                 |                 |                 |
|-------------------------|--------------------------------------|------------------------------|-----------------|-----------------|-----------------|-----------------|-----------------|
| CCUG 61962              | <i>A. mucicolens</i>                 | Human sputum, CF patient     | <b>HG423438</b> | <b>HG454840</b> | <b>HG454898</b> | <b>HG454956</b> | <b>HG455014</b> |
| CCUG 61965*             | <i>A. animicus</i>                   | Human sputum, CF patient     | <b>HG423439</b> | <b>HG454841</b> | <b>HG454899</b> | <b>HG454957</b> | <b>HG455015</b> |
| CCUG 61967              | <i>A. animicus</i>                   | Human sputum, CF patient     | <b>HG423440</b> | <b>HG454842</b> | <b>HG454900</b> | <b>HG454958</b> | <b>HG455016</b> |
| CCUG 61969              | <i>A. marplatensis/A. spiritinus</i> | Human sputum, non-CF patient | <b>HG423441</b> | <b>HG454843</b> | <b>HG454901</b> | <b>HG454959</b> | <b>HG455017</b> |
| CCUG 61970              | <i>A. marplatensis/A. spiritinus</i> | Human sputum, non-CF patient | <b>HG423442</b> | <b>HG454844</b> | <b>HG454902</b> | <b>HG454960</b> | <b>HG455018</b> |
| CCUG 61971              | <i>A. pulmonis</i>                   | Human sputum, CF patient     | <b>HG423443</b> | <b>HG454845</b> | <b>HG454903</b> | <b>HG454961</b> | <b>HG455019</b> |
| CCUG 61973              | <i>A. pulmonis</i>                   | Human sputum, CF patient     | <b>HG423444</b> | <b>HG454846</b> | <b>HG454904</b> | <b>HG454962</b> | <b>HG455020</b> |
| CCUG 30873 <sup>T</sup> | <i>Bordetella pertussis</i>          | Unknown                      | <b>HG423445</b> | <b>HG454847</b> | <b>HG454905</b> | <b>HG454963</b> | <b>HG455021</b> |

---

\*, indicated novel species, i.e., with *recA* gene similarities <97.6% to a recognized species.
