# Supplementary material for: Genotypic and Phenotypic Applications for the Differentiation and Species-Level Identification of Achromobacter for Clinical Diagnoses
Source: PubMed Central journal article supplement (PMC4256396; doi:10.1371/journal.pone.0114356), 2014-12-04
Supplement: pone.0114356.s002.pdf [file pone.0114356.s002.pdf]

**Supplemental Table S2.** Biochemical characteristics of all *Achromobacter* species strains examined. +, positive; -, negative; w, weak.

| STRAIN                  | recA IDENTIFICATION                  | Tests OX      |          |                        |                |                     |                     |                    |                  |                        |              |            |             |               |             | Tests DEC  |            |             |          |             |                 |            |               |               |                            |                            |                                                  |                 |               |                     |      |   |   |   |   |   |   |
|-------------------------|--------------------------------------|---------------|----------|------------------------|----------------|---------------------|---------------------|--------------------|------------------|------------------------|--------------|------------|-------------|---------------|-------------|------------|------------|-------------|----------|-------------|-----------------|------------|---------------|---------------|----------------------------|----------------------------|--------------------------------------------------|-----------------|---------------|---------------------|------|---|---|---|---|---|---|
|                         |                                      | Oxidase, TMPD | Catalase | Hemolysis, horse blood | Penicillin, mm | Blood 30°C - growth | Blood 37°C - growth | Drigalski - growth | NA 42°C - growth | Motility HD/30°C or OF | OF-D-Glucose | OF-Maltose | OF-Adonitol | OF-D-Fructose | OF-D-Xylose | Fluorescin | Centrimide | 10% Lactose | Tween 80 | Amylase, MH | 6% NaCl, growth | Lysine, LD | Ornithine, OD | Arginine, ADH | NO <sub>3</sub> -reduction | NO <sub>2</sub> -reduction | N <sub>2</sub> /N <sub>2</sub> O-denitrification | Urease, Christ. | Gelatine Kohn | Esculine hydrolysis | ONPG |   |   |   |   |   |   |
| CCUG 56438 <sup>T</sup> | <i>A. xylooxidans</i>                | +             | +        | -                      | -              | +                   | +                   | w                  | +                | +                      | -            | -          | -           | -             | -           | -          | -          | -           | -        | -           | -               | -          | -             | -             | -                          | -                          | -                                                | -               | -             | -                   | -    | - | - | - | - |   |   |
| CCUG 41513              | <i>A. xylooxidans</i>                | w             | +        | -                      | -              | w                   | +                   | w                  | w                | +                      | -            | -          | -           | -             | w           | -          | -          | -           | -        | -           | -               | -          | -             | -             | -                          | -                          | -                                                | -               | -             | -                   | -    | - | - | - | - |   |   |
| CCUG 42363              | <i>A. xylooxidans</i>                | +             | +        | -                      | -              | +                   | +                   | +                  | +                | +                      | +            | -          | -           | -             | -           | -          | -          | -           | -        | -           | -               | -          | -             | -             | -                          | -                          | -                                                | -               | -             | -                   | -    | - | - | - | - | - |   |
| CCUG 45179              | <i>A. xylooxidans</i>                | w             | +        | -                      | -              | +                   | +                   | w                  | +                | +                      | +            | -          | -           | -             | -           | -          | -          | -           | -        | -           | -               | -          | -             | -             | -                          | -                          | -                                                | -               | -             | -                   | -    | - | - | - | - | - |   |
| CCUG 47596              | <i>A. xylooxidans</i>                | +             | +        | -                      | -              | w                   | +                   | w                  | +                | +                      | -            | -          | -           | -             | -           | -          | -          | -           | -        | -           | -               | -          | -             | -             | -                          | -                          | -                                                | -               | -             | -                   | -    | - | - | - | - | - |   |
| CCUG 53465              | <i>A. xylooxidans</i>                | +             | +        | -                      | -              | +                   | +                   | +                  | +                | +                      | +            | -          | -           | -             | -           | -          | -          | -           | -        | -           | -               | -          | -             | -             | -                          | -                          | -                                                | -               | -             | -                   | -    | - | - | - | - | - |   |
| CCUG 53665              | <i>A. xylooxidans</i>                | +             | +        | -                      | -              | +                   | +                   | +                  | +                | +                      | +            | -          | -           | -             | w           | -          | -          | -           | -        | -           | -               | -          | -             | -             | -                          | -                          | -                                                | -               | -             | -                   | -    | - | - | - | - | - |   |
| CCUG 56295              | <i>A. xylooxidans</i>                | +             | w        | -                      | -              | +                   | +                   | +                  | +                | +                      | +            | -          | -           | -             | -           | -          | -          | -           | -        | -           | -               | -          | -             | -             | -                          | -                          | -                                                | -               | -             | -                   | -    | - | - | - | - | - |   |
| CCUG 57172              | <i>A. xylooxidans</i>                | +             | +        | -                      | -              | +                   | +                   | +                  | +                | +                      | +            | -          | -           | -             | -           | -          | -          | -           | -        | -           | -               | -          | -             | -             | -                          | -                          | -                                                | -               | -             | -                   | -    | - | - | - | - | - |   |
| CCUG 57103 <sup>T</sup> | <i>A. ruhlandii</i>                  | +             | +        | -                      | -              | +                   | +                   | +                  | +                | +                      | +            | -          | -           | -             | w           | -          | -          | -           | -        | -           | -               | -          | -             | -             | -                          | -                          | -                                                | -               | -             | -                   | -    | - | - | - | - | - |   |
| CCUG 2349*              | <i>A. ruhlandii</i>                  | -             | +        | -                      | -              | +                   | +                   | +                  | w                | +                      | -            | -          | -           | -             | -           | -          | -          | -           | -        | -           | -               | -          | -             | -             | -                          | -                          | -                                                | -               | -             | -                   | -    | - | - | - | - | - |   |
| CCUG 39682              | <i>A. ruhlandii</i>                  | +             | +        | -                      | -              | +                   | +                   | w                  | +                | w                      | -            | -          | -           | -             | w           | w          | -          | -           | -        | -           | -               | -          | -             | -             | -                          | -                          | -                                                | -               | -             | -                   | -    | - | - | - | - | - |   |
| CCUG 48135              | <i>A. ruhlandii</i>                  | w             | +        | -                      | -              | +                   | +                   | +                  | w                | +                      | -            | -          | -           | -             | +           | -          | -          | -           | -        | -           | -               | -          | -             | -             | -                          | -                          | -                                                | -               | -             | -                   | -    | - | - | - | - | - |   |
| CCUG 48331              | <i>A. ruhlandii</i>                  | +             | +        | -                      | -              | +                   | +                   | +                  | +                | +                      | +            | -          | -           | -             | +           | -          | -          | -           | -        | -           | -               | -          | -             | -             | -                          | -                          | -                                                | -               | -             | -                   | -    | - | - | - | - | - |   |
| CCUG 48386              | <i>A. ruhlandii</i>                  | +             | +        | -                      | -              | +                   | +                   | +                  | +                | +                      | +            | -          | -           | -             | +           | -          | -          | -           | -        | -           | -               | -          | -             | -             | -                          | -                          | -                                                | -               | -             | -                   | -    | - | - | - | - | - | - |
| CCUG 48584              | <i>A. ruhlandii</i>                  | +             | +        | -                      | -              | +                   | +                   | +                  | +                | +                      | +            | -          | -           | -             | -           | -          | -          | -           | -        | -           | -               | -          | -             | -             | -                          | -                          | -                                                | -               | -             | -                   | -    | - | - | - | - | - | - |
| CCUG 48684              | <i>A. ruhlandii</i>                  | +             | +        | -                      | -              | +                   | +                   | +                  | +                | +                      | +            | -          | -           | -             | -           | -          | -          | -           | -        | -           | -               | -          | -             | -             | -                          | -                          | -                                                | -               | -             | -                   | -    | - | - | - | - | - | - |
| CCUG 52730              | <i>A. ruhlandii</i>                  | +             | +        | -                      | -              | +                   | +                   | +                  | +                | +                      | +            | -          | -           | -             | w           | -          | -          | -           | -        | -           | -               | -          | -             | -             | -                          | -                          | -                                                | -               | -             | -                   | -    | - | - | - | - | - | - |
| CCUG 56600              | <i>A. ruhlandii</i>                  | +             | +        | -                      | -              | w                   | +                   | w                  | +                | +                      | +            | -          | -           | -             | -           | -          | -          | -           | -        | -           | -               | -          | -             | -             | -                          | -                          | -                                                | -               | -             | -                   | -    | - | - | - | - | - | - |
| CCUG 724 <sup>T</sup>   | <i>A. piechaudii</i>                 | +             | +        | -                      | -              | +                   | +                   | +                  | +                | +                      | +            | -          | -           | -             | -           | -          | -          | -           | -        | -           | -               | -          | -             | -             | -                          | -                          | -                                                | -               | -             | -                   | -    | - | - | - | - | - | - |
| CCUG 47463              | <i>A. piechaudii</i>                 | +             | w        | -                      | -              | +                   | +                   | +                  | w                | +                      | -            | -          | -           | -             | -           | w          | -          | -           | -        | -           | -               | -          | -             | -             | -                          | -                          | -                                                | -               | -             | -                   | -    | - | - | - | - | - | - |
| CCUG 56089*             | <i>A. piechaudii</i>                 | w             | +        | -                      | -              | +                   | +                   | +                  | +                | +                      | +            | -          | -           | -             | -           | -          | -          | -           | -        | -           | -               | -          | -             | -             | -                          | -                          | -                                                | -               | -             | -                   | -    | - | - | - | - | - | - |
| CCUG 407 <sup>T</sup>   | <i>A. denitrificans</i>              | +             | +        | -                      | -              | +                   | +                   | +                  | w                | +                      | -            | -          | -           | -             | -           | -          | -          | -           | -        | -           | -               | -          | -             | -             | -                          | -                          | -                                                | -               | -             | -                   | -    | - | - | - | - | - | - |
| CCUG 307*               | <i>A. denitrificans</i>              | nd            | nd       | w                      | -              | +                   | +                   | +                  | -                | +                      | -            | -          | -           | -             | -           | -          | -          | -           | -        | -           | -               | -          | -             | -             | -                          | -                          | -                                                | -               | -             | -                   | -    | - | - | - | - | - | - |
| CCUG 2072*              | <i>A. denitrificans</i>              | +             | +        | -                      | -              | +                   | +                   | +                  | +                | w                      | -            | -          | -           | -             | -           | -          | -          | -           | -        | -           | -               | -          | -             | -             | -                          | -                          | -                                                | -               | -             | -                   | -    | - | - | - | - | - | - |
| CCUG 56202*             | <i>A. denitrificans</i>              | +             | +        | -                      | -              | +                   | +                   | +                  | +                | +                      | -            | -          | -           | -             | -           | -          | -          | -           | -        | -           | -               | -          | -             | -             | -                          | -                          | -                                                | -               | -             | -                   | -    | - | - | - | - | - | - |
| CCUG 54268*             | <i>A. denitrificans</i>              | +             | +        | -                      | -              | +                   | +                   | w                  | -                | +                      | -            | -          | -           | -             | -           | -          | -          | -           | -        | -           | -               | -          | -             | -             | -                          | -                          | -                                                | -               | -             | -                   | -    | - | - | - | - | - | - |
| CCUG 47057 <sup>T</sup> | <i>A. insolitus</i>                  | +             | +        | -                      | -              | +                   | +                   | +                  | +                | w                      | -            | -          | -           | -             | -           | -          | -          | -           | -        | -           | -               | -          | -             | -             | -                          | -                          | -                                                | -               | -             | -                   | -    | - | - | - | - | - | - |
| CCUG 366                | <i>A. insolitus</i>                  | +             | +        | -                      | -              | +                   | +                   | +                  | +                | +                      | +            | -          | -           | -             | -           | -          | -          | -           | -        | -           | -               | -          | -             | -             | -                          | -                          | -                                                | -               | -             | -                   | -    | - | - | - | - | - | - |
| CCUG 47056              | <i>A. insolitus</i>                  | +             | +        | -                      | -              | +                   | +                   | +                  | +                | +                      | +            | -          | -           | -             | -           | -          | -          | -           | -        | -           | -               | -          | -             | -             | -                          | -                          | -                                                | -               | -             | -                   | -    | - | - | - | - | - | - |
| CCUG 47059              | <i>A. insolitus</i>                  | +             | +        | -                      | -              | +                   | +                   | +                  | +                | +                      | +            | -          | -           | -             | -           | w          | -          | -           | -        | -           | -               | -          | -             | -             | -                          | -                          | -                                                | -               | -             | -                   | -    | - | - | - | - | - | - |
| CCUG 47060              | <i>A. insolitus</i>                  | +             | +        | -                      | -              | +                   | +                   | +                  | +                | +                      | +            | -          | -           | -             | -           | w          | -          | -           | -        | -           | -               | -          | -             | -             | -                          | -                          | -                                                | -               | -             | -                   | -    | - | - | - | - | - | - |
| CCUG 47061              | <i>A. insolitus</i>                  | +             | +        | -                      | -              | +                   | +                   | +                  | +                | +                      | +            | -          | -           | -             | -           | w          | -          | -           | -        | -           | -               | -          | -             | -             | -                          | -                          | -                                                | -               | -             | -                   | -    | - | - | - | - | - | - |
| CCUG 55796              | <i>A. insolitus</i>                  | +             | +        | -                      | -              | +                   | +                   | +                  | w                | +                      | -            | -          | -           | -             | -           | -          | -          | -           | -        | -           | -               | -          | -             | -             | -                          | -                          | -                                                | -               | -             | -                   | -    | - | - | - | - | - | - |
| CCUG 56040              | <i>A. insolitus</i>                  | +             | +        | -                      | -              | +                   | +                   | w                  | -                | +                      | -            | -          | -           | -             | -           | -          | -          | -           | -        | -           | -               | -          | -             | -             | -                          | -                          | -                                                | -               | -             | -                   | -    | - | - | - | - | - | - |
| CCUG 47062 <sup>T</sup> | <i>A. spanius</i>                    | w             | +        | -                      | -              | +                   | +                   | +                  | +                | +                      | +            | -          | -           | -             | -           | -          | -          | -           | -        | -           | -               | -          | -             | -             | -                          | -                          | -                                                | -               | -             | -                   | -    | - | - | - | - | - | - |
| CCUG 31491              | <i>A. spanius</i>                    | +             | +        | -                      | -              | w                   | +                   | w                  | -                | -                      | -            | -          | -           | -             | w           | -          | -          | -           | -        | -           | -               | -          | -             | -             | -                          | -                          | -                                                | -               | -             | -                   | -    | - | - | - | - | - | - |
| CCUG 44449              | <i>A. spanius</i>                    | w             | w        | -                      | -              | w                   | +                   | w                  | -                | +                      | -            | -          | -           | -             | -           | -          | -          | -           | -        | -           | -               | -          | -             | -             | -                          | -                          | -                                                | -               | -             | -                   | -    | - | - | - | - | - | - |
| CCUG 47063              | <i>A. spanius</i>                    | +             | +        | -                      | -              | +                   | +                   | +                  | +                | +                      | +            | -          | -           | -             | -           | -          | -          | -           | -        | -           | -               | -          | -             | -             | -                          | -                          | -                                                | -               | -             | -                   | -    | - | - | - | - | - | - |
| CCUG 47064              | <i>A. spanius</i>                    | +             | +        | -                      | -              | +                   | +                   | w                  | -                | +                      | -            | -          | -           | -             | -           | -          | -          | -           | -        | -           | -               | -          | -             | -             | -                          | -                          | -                                                | -               | -             | -                   | -    | - | - | - | - | - | - |
| CCUG 56371 <sup>T</sup> | <i>A. marplatensis</i>               | +             | +        | -                      | -              | +                   | +                   | +                  | +                | w                      | -            | -          | -           | -             | -           | -          | -          | -           | -        | -           | -               | -          | -             | -             | -                          | -                          | -                                                | -               | -             | -                   | -    | - | - | - | - | - | - |
| CCUG 47382              | <i>A. spiritinus/A. marplatensis</i> | w             | +        | -                      | -              | +                   | +                   | +                  | w                | +                      | -            | -          | -           | -             | -           | -          | -          | -           | -        | -           | -               | -          | -             | -             | -                          | -                          | -                                                | -               | -             | -                   | -    | - | - | - | - | - | - |
| CCUG 61966 <sup>T</sup> | <i>A. animicus</i>                   | +             | +        | -                      | -              | +                   | +                   | +                  | +                | +                      | +            | -          | -           | -             | -           | -          | -          | -           | -        | -           | -               | -          | -             | -             | -                          | -                          | -                                                | -               | -             | -                   | -    | - | - | - | - | - | - |
| CCUG 61965*             | <i>A. animicus</i>                   | +             | +        | -                      | -              | +                   | +                   | +                  | +                | +                      | +            | -          | -           | -             | -           | -          | -          | -           | -        | -           | -               | -          | -             | -             | -                          | -                          | -                                                | -               | -             | -                   | -    | - | - | - | - | - | - |
| CCUG 61967              | <i>A. animicus</i>                   | +             | +        | -                      | -              | +                   | +                   | +                  | +                | +                      | +            | -          | -           | -             | -           | -          | -          | -           | -        | -           | -               | -          | -             | -             | -                          | -                          | -                                                | -               | -             | -                   | -    | - | - | - | - | - | - |
| CCUG 61961 <sup>T</sup> | <i>A. mucicolens</i>                 | +             | +        | -                      | -              | +                   | +                   | +                  | +                | +                      | +            | -          | -           | -             | -           | w          | -          | -           | -        | -           | -               | -          | -             | -             | -                          | -                          | -                                                | -               | -             | -                   | -    | - | - | - | - | - | - |
| CCUG 54301              | <i>A. mucicolens</i>                 | +             | +        | -                      | -              | +                   | +                   | w                  | +                | +                      | +            | -          | -           | -             | -           | -          | -          | -           | -        | -           | -               | -          | -             | -             | -                          | -                          | -                                                | -               | -             | -                   | -    | - | - | - | - | - | - |
| CCUG 61960              | <i>A. mucicolens</i>                 | w             | +        | -                      | -              | +                   | +                   | +                  | +                | +                      | +            | -          | -           | -             | -           | -          | -          | -           | -        | -           | -               | -          | -             | -             | -                          | -                          | -                                                | -               | -             | -                   | -    | - | - | - | - | - | - |
| CCUG 61962              | <i>A. mucicolens</i>                 | +             | +        | -                      | -              | +                   | +                   | +                  | +                | +                      | +            | -          | -           | -             | -           | -          | -          | -           | -        | -           | -               | -          | -             | -             | -                          | -                          | -                                                | -               | -             | -                   | -    | - | - | - | - | - | - |
| CCUG 61972 <sup>T</sup> | <i>A. pulmonis</i>                   | w             | +        | -                      | -              | +                   | +                   | +                  | +                | +                      | +            | -          | -           | -             | -           | -          | -          | -           | -        | -           | -               | -          | -             | -             | -                          | -                          | -                                                | -               | -             | -                   | -    | - | - | - | - | - | - |
| CCUG 52128              | <i>A. pulmonis</i>                   | w             | +        | -                      | -              | +                   | +                   | +                  | +                | +                      | +            | -          | -           | -             | -           | -          | -          | -           | -        | -           | -               | -          | -             | -             | -                          | -                          | -                                                | -               | -             | -                   | -    | - | - | - | - | - | - |
| CCUG 54610*             | <i>A. pulmonis</i>                   | +             | +        | -                      | -              | +                   | +                   | +                  | +                | +                      | +            | -          | -           | -             | -           | -          | -          | -           | -        | -           | -               | -          | -             | -             | -                          | -                          | -                                                | -               | -             | -                   | -    | - | - | - | - | - | - |
| CCUG 61971              | <i>A. pulmonis</i>                   | +             | +        | -                      | -              | +                   | +                   | w                  | +                | +                      | -            | -          | -           | -             | -           | -          | -          | -           | -        | -           | -               | -          | -             | -             | -                          | -                          | -                                                | -               | -             | -                   | -    | - | - | - | - | - | - |
| CCUG 61973              | <i>A. pulmonis</i>                   | +             | +        | -                      | -              | +                   | +                   | +                  | +                | +                      | +            | -          | -           | -             | w           | -          | -          | -           | -        | -           | -               | -          | -             | -             | -                          | -                          | -                                                | -               | -             | -                   | -    | - | - | - | - | - | - |
| CCUG 61968 <sup>T</sup> | <i>A. spiritinus</i>                 | w             | +        | -                      | -              | +                   | +                   | +                  | +                | +                      | +            | -          | -           | -             | -           | -          | -          | -           | -        | -           | -               | -          | -             | -             | -                          | -                          | -                                                | -               | -             | -                   | -    | - | - | - | - | - | - |
| CCUG 61969              | <i>A. marplatensis/A. spiritinus</i> | +             | +        | -                      | -              | +                   | +                   | +                  | +                | +                      | +            | -          | -           | -             | -           | -          | -          | -           | -        | -           | -               | -          | -             | -             | -                          | -                          | -                                                | -               | -             | -                   | -    | - | - | - | - | - | - |
| CCUG 61970              | <i>A. marplatensis/A. spiritinus</i> | +             | +        | -                      | -              | +                   |                     |                    |                  |                        |              |            |             |               |             |            |            |             |          |             |                 |            |               |               |                            |                            |                                                  |                 |               |                     |      |   |   |   |   |   |   |



Tests API ZYM

| Caprate | Adipate | L-Malate | Citrate | Phenylacetate | Oxidase | Alkaline Phosphatase | Esterase (C-4) | Ester Lipase (C-8) | Lipase (C-14) | Leucine arylamidase | Valine arylamidase | Cysteine arylamidase | Trypsin | Chymotrypsin | Acid Phosphatase | Phosphoamidase | $\alpha$ -galactosidase | $\beta$ -galactosidase | $\beta$ -glucuronidase | $\alpha$ -glucosidase | $\beta$ -glucosidase | N-Acetyl- $\beta$ -gluc | $\alpha$ -mannosidase | $\alpha$ -fucosidase | STRAIN                  |
|---------|---------|----------|---------|---------------|---------|----------------------|----------------|--------------------|---------------|---------------------|--------------------|----------------------|---------|--------------|------------------|----------------|-------------------------|------------------------|------------------------|-----------------------|----------------------|-------------------------|-----------------------|----------------------|-------------------------|
| +       | +       | +        | +       | +             | +       | w                    | w              | -                  | -             | +                   | -                  | -                    | -       | -            | +                | -              | -                       | -                      | -                      | -                     | -                    | -                       | -                     | -                    | CCUG 56438 <sup>T</sup> |
| -       | w       | +        | w       | w             | -       | w                    | w              | w                  | -             | -                   | -                  | -                    | -       | +            | +                | -              | -                       | -                      | -                      | -                     | -                    | -                       | -                     | -                    | CCUG 41513              |
| w       | w       | +        | +       | +             | +       | -                    | -              | -                  | -             | -                   | -                  | -                    | -       | -            | +                | -              | -                       | -                      | -                      | -                     | -                    | -                       | -                     | -                    | CCUG 42363              |
| +       | w       | +        | +       | w             | -       | -                    | +              | -                  | -             | -                   | -                  | -                    | -       | -            | -                | -              | -                       | -                      | -                      | -                     | -                    | -                       | -                     | -                    | CCUG 45179              |
| +       | +       | +        | +       | +             | +       | +                    | +              | -                  | -             | -                   | -                  | -                    | -       | -            | +                | -              | -                       | -                      | -                      | -                     | -                    | -                       | -                     | -                    | CCUG 47596              |
| w       | w       | +        | +       | +             | +       | w                    | +              | -                  | -             | +                   | -                  | -                    | -       | w            | w                | -              | -                       | -                      | -                      | -                     | -                    | -                       | -                     | -                    | CCUG 53465              |
| +       | +       | +        | +       | +             | +       | +                    | +              | -                  | -             | -                   | -                  | -                    | -       | -            | +                | -              | -                       | -                      | -                      | -                     | -                    | -                       | -                     | -                    | CCUG 53665              |
| +       | +       | +        | +       | +             | +       | w                    | w              | -                  | -             | +                   | -                  | -                    | -       | -            | +                | -              | -                       | -                      | -                      | -                     | -                    | -                       | -                     | -                    | CCUG 56295              |
| +       | +       | +        | +       | +             | +       | w                    | w              | -                  | -             | +                   | -                  | -                    | -       | -            | -                | -              | -                       | -                      | -                      | -                     | -                    | -                       | -                     | -                    | CCUG 57172              |
| w       | w       | +        | +       | +             | +       | -                    | -              | -                  | -             | -                   | -                  | -                    | -       | -            | w                | -              | -                       | -                      | -                      | -                     | -                    | -                       | -                     | -                    | CCUG 57103 <sup>T</sup> |
| +       | +       | +        | +       | +             | -       | +                    | -              | -                  | -             | +                   | -                  | -                    | -       | w            | +                | -              | -                       | -                      | -                      | -                     | -                    | -                       | -                     | -                    | CCUG 2349               |
| w       | w       | +        | +       | +             | +       | w                    | w              | w                  | -             | +                   | -                  | -                    | -       | -            | +                | -              | -                       | -                      | -                      | -                     | -                    | -                       | -                     | -                    | CCUG 39682              |
| -       | -       | +        | +       | w             | -       | +                    | w              | -                  | -             | +                   | -                  | -                    | -       | -            | +                | -              | -                       | -                      | -                      | -                     | -                    | -                       | -                     | -                    | CCUG 48135              |
| +       | +       | +        | +       | +             | +       | w                    | +              | -                  | -             | +                   | -                  | -                    | -       | -            | +                | -              | -                       | -                      | -                      | -                     | -                    | -                       | -                     | -                    | CCUG 48331              |
| +       | +       | +        | +       | +             | +       | +                    | w              | -                  | -             | +                   | -                  | -                    | -       | -            | +                | -              | -                       | -                      | -                      | -                     | -                    | -                       | -                     | -                    | CCUG 48386              |
| +       | +       | +        | +       | +             | +       | w                    | +              | -                  | -             | +                   | -                  | -                    | -       | -            | +                | -              | -                       | -                      | -                      | -                     | -                    | -                       | -                     | -                    | CCUG 48584              |
| +       | +       | +        | +       | +             | +       | w                    | +              | -                  | -             | +                   | -                  | -                    | -       | -            | +                | -              | -                       | -                      | -                      | -                     | -                    | -                       | -                     | -                    | CCUG 48684              |
| w       | -       | +        | +       | +             | +       | w                    | w              | -                  | -             | +                   | -                  | -                    | -       | -            | +                | -              | -                       | -                      | -                      | -                     | -                    | -                       | -                     | -                    | CCUG 52730              |
| +       | +       | +        | +       | +             | +       | -                    | w              | -                  | -             | +                   | -                  | -                    | -       | -            | +                | -              | -                       | -                      | -                      | -                     | -                    | -                       | -                     | -                    | CCUG 56600              |
| -       | +       | +        | +       | +             | +       | -                    | +              | -                  | -             | +                   | -                  | -                    | -       | -            | -                | -              | -                       | -                      | -                      | -                     | -                    | -                       | -                     | -                    | CCUG 724 <sup>T</sup>   |
| -       | +       | +        | +       | +             | +       | w                    | w              | -                  | -             | +                   | -                  | -                    | -       | -            | +                | -              | -                       | -                      | -                      | -                     | -                    | -                       | -                     | -                    | CCUG 47463              |
| w       | +       | +        | +       | +             | w       | -                    | -              | -                  | -             | +                   | -                  | -                    | -       | -            | +                | -              | -                       | -                      | -                      | w                     | -                    | -                       | -                     | -                    | CCUG 56089              |
| +       | +       | +        | +       | +             | +       | -                    | +              | -                  | -             | +                   | -                  | -                    | -       | -            | -                | -              | -                       | -                      | -                      | -                     | -                    | -                       | -                     | -                    | CCUG 407 <sup>T</sup>   |
| +       | +       | +        | +       | +             | +       | +                    | w              | -                  | -             | +                   | -                  | -                    | -       | -            | +                | -              | -                       | -                      | -                      | -                     | -                    | -                       | -                     | -                    | CCUG 307                |
| w       | +       | +        | +       | +             | +       | w                    | w              | -                  | -             | +                   | -                  | -                    | -       | -            | +                | -              | -                       | -                      | -                      | -                     | -                    | -                       | -                     | -                    | CCUG 2072               |
| +       | +       | +        | +       | +             | +       | -                    | -              | -                  | -             | -                   | -                  | -                    | -       | -            | -                | -              | -                       | -                      | -                      | -                     | -                    | -                       | -                     | -                    | CCUG 56202              |
| -       | -       | +        | +       | +             | +       | +                    | +              | -                  | -             | +                   | -                  | -                    | -       | -            | +                | -              | -                       | -                      | -                      | -                     | -                    | -                       | -                     | -                    | CCUG 54268              |
| w       | w       | +        | +       | +             | +       | w                    | w              | -                  | -             | +                   | -                  | -                    | -       | -            | +                | -              | -                       | -                      | -                      | -                     | -                    | -                       | -                     | -                    | CCUG 47057 <sup>T</sup> |
| +       | +       | +        | +       | +             | +       | -                    | w              | w                  | -             | -                   | -                  | -                    | -       | -            | -                | -              | -                       | -                      | -                      | -                     | -                    | -                       | -                     | -                    | CCUG 366                |
| w       | w       | +        | +       | +             | +       | w                    | +              | -                  | -             | +                   | -                  | -                    | -       | -            | +                | -              | -                       | -                      | -                      | -                     | -                    | -                       | -                     | -                    | CCUG 47056              |
| +       | +       | +        | +       | +             | +       | w                    | +              | -                  | -             | +                   | -                  | -                    | -       | -            | +                | -              | -                       | -                      | -                      | -                     | -                    | -                       | -                     | -                    | CCUG 47059              |
| -       | +       | +        | +       | +             | +       | -                    | w              | -                  | -             | +                   | -                  | -                    | -       | -            | -                | -              | -                       | -                      | -                      | -                     | -                    | -                       | -                     | -                    | CCUG 47060              |
| -       | +       | +        | +       | +             | +       | -                    | w              | -                  | -             | +                   | -                  | -                    | -       | -            | +                | -              | -                       | -                      | -                      | -                     | -                    | -                       | -                     | -                    | CCUG 47061              |
| +       | +       | +        | +       | +             | +       | -                    | w              | -                  | -             | +                   | -                  | -                    | -       | -            | +                | -              | -                       | -                      | -                      | -                     | -                    | -                       | -                     | -                    | CCUG 55796              |
| +       | +       | +        | +       | +             | +       | w                    | w              | -                  | -             | +                   | -                  | -                    | -       | -            | -                | -              | -                       | -                      | -                      | -                     | -                    | -                       | -                     | -                    | CCUG 56040              |
| -       | -       | +        | +       | +             | w       | -                    | +              | -                  | -             | +                   | -                  | -                    | -       | -            | w                | -              | -                       | -                      | -                      | -                     | -                    | -                       | -                     | -                    | CCUG 47062 <sup>T</sup> |
| -       | +       | +        | +       | w             | +       | w                    | w              | -                  | -             | +                   | -                  | -                    | -       | -            | +                | -              | -                       | -                      | -                      | -                     | -                    | -                       | -                     | -                    | CCUG 31491              |
| -       | +       | +        | +       | +             | w       | w                    | w              | -                  | -             | +                   | -                  | -                    | -       | -            | +                | -              | -                       | -                      | -                      | -                     | -                    | -                       | -                     | -                    | CCUG 44449              |
| -       | -       | +        | +       | +             | +       | -                    | w              | -                  | -             | +                   | -                  | -                    | -       | -            | +                | -              | -                       | -                      | -                      | -                     | -                    | -                       | -                     | -                    | CCUG 47063              |
| -       | -       | +        | +       | +             | +       | -                    | w              | -                  | -             | +                   | -                  | -                    | -       | -            | +                | -              | -                       | -                      | -                      | -                     | -                    | -                       | -                     | -                    | CCUG 47064              |
| -       | w       | w        | w       | w             | +       | +                    | w              | -                  | -             | +                   | -                  | -                    | -       | -            | w                | -              | -                       | -                      | -                      | -                     | -                    | -                       | -                     | -                    | CCUG 56371 <sup>T</sup> |
| -       | w       | +        | +       | +             | +       | -                    | w              | -                  | -             | +                   | -                  | -                    | -       | -            | -                | -              | -                       | -                      | -                      | -                     | -                    | -                       | -                     | -                    | CCUG 47382              |
| -       | +       | +        | +       | +             | +       | -                    | +              | -                  | -             | +                   | -                  | -                    | -       | -            | -                | -              | -                       | -                      | -                      | -                     | -                    | -                       | -                     | -                    | CCUG 61966 <sup>T</sup> |
| w       | +       | +        | +       | +             | +       | w                    | w              | -                  | -             | +                   | -                  | -                    | -       | -            | w                | w              | -                       | -                      | -                      | -                     | -                    | -                       | -                     | -                    | CCUG 61965              |
| w       | +       | +        | +       | +             | +       | -                    | w              | -                  | -             | +                   | -                  | -                    | -       | -            | +                | w              | -                       | -                      | -                      | -                     | -                    | -                       | -                     | -                    | CCUG 61967              |
| w       | +       | +        | +       | +             | +       | -                    | w              | -                  | -             | +                   | -                  | -                    | -       | -            | w                | w              | -                       | -                      | -                      | -                     | -                    | -                       | -                     | -                    | CCUG 61961 <sup>T</sup> |
| -       | +       | +        | +       | +             | +       | -                    | -              | -                  | -             | w                   | -                  | -                    | -       | -            | -                | -              | -                       | -                      | -                      | -                     | -                    | -                       | -                     | -                    | CCUG 54301              |
| w       | +       | +        | +       | +             | +       | w                    | +              | -                  | -             | +                   | w                  | -                    | -       | -            | w                | -              | -                       | -                      | -                      | -                     | -                    | -                       | -                     | -                    | CCUG 61960              |
| w       | +       | +        | +       | +             | +       | w                    | +              | -                  | -             | +                   | -                  | -                    | -       | -            | -                | -              | -                       | -                      | -                      | -                     | -                    | -                       | -                     | -                    | CCUG 61962              |
| -       | +       | +        | +       | +             | w       | -                    | -              | -                  | -             | +                   | -                  | -                    | -       | -            | -                | -              | -                       | -                      | -                      | -                     | -                    | -                       | -                     | -                    | CCUG 61972 <sup>T</sup> |
| +       | +       | +        | +       | +             | w       | -                    | +              | -                  | -             | +                   | -                  | -                    | -       | -            | w                | w              | -                       | -                      | -                      | -                     | -                    | -                       | -                     | -                    | CCUG 52128              |
| +       | +       | +        | w       | +             | +       | -                    | -              | -                  | -             | -                   | -                  | -                    | -       | -            | -                | -              | -                       | -                      | -                      | -                     | -                    | -                       | -                     | -                    | CCUG 54610              |
| +       | +       | +        | +       | +             | +       | -                    | w              | -                  | -             | w                   | -                  | -                    | -       | -            | -                | -              | -                       | -                      | -                      | -                     | -                    | -                       | -                     | -                    | CCUG 61971              |
| +       | +       | +        | +       | +             | +       | w                    | w              | -                  | -             | +                   | -                  | -                    | -       | -            | -                | -              | -                       | -                      | -                      | -                     | -                    | -                       | -                     | -                    | CCUG 61973              |
| +       | +       | +        | +       | +             | w       | +                    | w              | -                  | -             | +                   | -                  | -                    | -       | -            | +                | -              | -                       | -                      | -                      | -                     | -                    | -                       | -                     | -                    | CCUG 61968 <sup>T</sup> |
| w       | +       | +        | +       | +             | +       | w                    | w              | -                  | -             | +                   | -                  | -                    | -       | -            | -                | -              | -                       | -                      | -                      | -                     | -                    | -                       | -                     | -                    | CCUG 61969              |
| -       | w       | +        | +       | +             | +       | w                    | w              | -                  | -             | +                   | -                  | -                    | -       | -            | -                | -              | -                       | -                      | -                      | -                     | -                    | -                       | -                     | -                    | CCUG 61970              |

Tests API ZYM
