# Supplementary material for: Genotypic and Phenotypic Applications for the Differentiation and Species-Level Identification of Achromobacter for Clinical Diagnoses
Source: PubMed Central journal article supplement (PMC4256396; doi:10.1371/journal.pone.0114356), 2014-12-04
Supplement: pone.0114356.s003.pdf [file pone.0114356.s003.pdf]

**Supplemental Table S3.** Genetic diversity of the selected loci among the *Achromobacter* type strains and the clinical isolates analyzed in this study.

| No. of strains           | Locus       | Fragment length (bp) | No. of alleles | No. of polymorphic sites |
|--------------------------|-------------|----------------------|----------------|--------------------------|
| <b>Type strains</b>      |             |                      |                |                          |
| 11                       | 16S rRNA    | 1354                 | 10             | 13                       |
| 11                       | <i>atpD</i> | 727                  | 11             | 68                       |
| 11                       | <i>gyrB</i> | 593                  | 11             | 100                      |
| 11                       | <i>recA</i> | 621                  | 11             | 128                      |
| 11                       | <i>rpoB</i> | 598                  | 11             | 79                       |
| <b>Clinical isolates</b> |             |                      |                |                          |
| 57                       | 16S rRNA    | 344                  | 4              | 7                        |
| 57                       | <i>atpD</i> | 513                  | 34             | 70                       |
| 57                       | <i>gyrB</i> | 528                  | 45             | 124                      |
| 57                       | <i>recA</i> | 621                  | 43             | 151                      |
| 57                       | <i>rpoB</i> | 527                  | 43             | 89                       |
