# Supplementary material for: Genotypic and Phenotypic Applications for the Differentiation and Species-Level Identification of Achromobacter for Clinical Diagnoses
Source: PubMed Central journal article supplement (PMC4256396; doi:10.1371/journal.pone.0114356), 2014-12-04
Supplement: pone.0114356.s004.pdf [file pone.0114356.s004.pdf]

**Supplemental Table S4.** Genetic diversity values for the loci *atpD*, *recA* and *rpoB* obtained in our study compared with the results obtained for different authors, and genetic diversity for *nrdA* gene analyzed for other authors. For those genetic diversity calculations only the seven type strains commons in all studies were considered.

|                         | <b>Locus</b> | <b>Fragment length (bp)</b> | <b>No. of alleles</b> | <b>No. of polymorphic sites</b> | <b>Average number of nucleotide differences</b> |
|-------------------------|--------------|-----------------------------|-----------------------|---------------------------------|-------------------------------------------------|
| This study              | <i>atpD</i>  | 775                         | 7                     | 62                              | 26.57143                                        |
| Riddeberg <i>et al.</i> |              | 399                         | 7                     | 50                              | 21.90476                                        |
| This study              | <i>recA</i>  | 695                         | 7                     | 124                             | 52.09524                                        |
| Riddeberg <i>et al.</i> |              | 459                         | 7                     | 92                              | 40.09524                                        |
| This study              | <i>rpoB</i>  | 964                         | 7                     | 104                             | 44.42857                                        |
| Riddeberg <i>et al.</i> |              | 513                         | 7                     | 66                              | 27.33333                                        |
| Spilker <i>et al.</i>   |              | 413                         | 7                     | 30                              | 11.42857                                        |
| Spilker <i>et al.</i>   | <i>nrdA</i>  | 449                         | 7                     | 60                              | 27.61905                                        |
| Spilker <i>et al.</i>   | <i>nrdA</i>  | 765                         | 7                     | 115                             | 50.38095                                        |
